# Supplementary material for: Improving coloration time and moisture stability of photochromic viologen–carboxylate zwitterions
Source: Royal Society of Chemistry journal article supplement (doi:10.1039/c8nj02326c), 2018-01-01
Supplement: c8nj02326c1.pdf [file c8nj02326c1.pdf]

## New Journal of Chemistry

### Electronic Supporting Information

#### Improving Coloration time and Moisture Stability of Photochromic Viologen– Carboxylate Zwitterion†

Pei-Yu Guo,<sup>ab</sup> Cai Sun,<sup>ab</sup> Ning-Ning Zhang,<sup>ab</sup> Li-Zhen Cai,<sup>a</sup> Ming-Sheng Wang<sup>\*a</sup>,  
Guo-Cong Guo<sup>a</sup>

<sup>a</sup>*State Key Laboratory of Structural Chemistry, Fujian Institute of Research on the  
Structure of Matter, Chinese Academy of Sciences, Fuzhou, Fujian 350002, PR China*

<sup>b</sup>*University of Chinese Academy of Sciences, Beijing 100039, PR China*

---

\*E-mail: [mawang@fjirsm.ac.cn](mailto:mawang@fjirsm.ac.cn) (M.S. Wang)

### Content

|               |    |
|---------------|----|
| Table S1..... | S1 |
| Table S2..... | S2 |
| Table S3..... | S3 |
| Table S4..... | S4 |
| Fig. S1 ..... | S4 |
| Fig. S2 ..... | S5 |
| Fig. S3 ..... | S5 |
| Fig. S4 ..... | S6 |
| Fig. S5 ..... | S6 |
| Fig. S6 ..... | S6 |
| Fig. S7 ..... | S7 |
| Fig. S8 ..... | S7 |
| Fig. S9 ..... | S8 |

**Table S1** Crystal and structure data for L·6H<sub>2</sub>O.

|                                                                               | L·6H <sub>2</sub> O (as-synthesized)                                              |
|-------------------------------------------------------------------------------|-----------------------------------------------------------------------------------|
| Chemical formula                                                              | C <sub>16</sub> H <sub>16</sub> N <sub>2</sub> O <sub>4</sub> · 6H <sub>2</sub> O |
| $M_r$                                                                         | 408.40                                                                            |
| Crystal system                                                                | Monoclinic                                                                        |
| space group                                                                   | <i>C2/c</i>                                                                       |
| Temperature (K)                                                               | 293                                                                               |
| $a, b, c$ (Å)                                                                 | 15.239(16), 7.250(7), 18.806(19)                                                  |
| $\beta$ (°)                                                                   | 96.75(11)                                                                         |
| $V$ (Å <sup>3</sup> )                                                         | 2063(4)                                                                           |
| $Z$                                                                           | 4                                                                                 |
| Radiation type                                                                | Mo- $K_\alpha$                                                                    |
| $\mu$ (mm <sup>-1</sup> )                                                     | 0.11                                                                              |
| Crystal size (mm)                                                             | 0.15 × 0.02 × 0.02                                                                |
| Data collection Diffractometer                                                | Rigaku Pilatus 200K                                                               |
| Absorption correction                                                         | Multi-scan                                                                        |
| $T_{\min}, T_{\max}$                                                          | 0.583, 1.000                                                                      |
| No. of measured, independent and<br>observed [ $I > 2\sigma(I)$ ] reflections | 10523, 2379, 1121                                                                 |
| $R_{\text{int}}$                                                              | 0.098                                                                             |
| $R[F^2 > 2\sigma(F^2)], wR(F^2), S$                                           | 0.066, 0.183, 0.85                                                                |
| No. of reflections                                                            | 2379                                                                              |
| No. of parameters                                                             | 145                                                                               |
| No. of restraints                                                             | 9                                                                                 |
| $\Delta\rho_{\max}, \Delta\rho_{\min}$ (e/Å <sup>-3</sup> )                   | 0.31, -0.42                                                                       |

**Table S2** Selected bond length [ $\text{\AA}$ ] and angles [ $^\circ$ ] of  $\text{L}\cdot 6\text{H}_2\text{O}$ .

| <b>Bond</b>        | <b>Length / <math>\text{\AA}</math></b> | <b>Bond</b>   | <b>Length / <math>\text{\AA}</math></b> |
|--------------------|-----------------------------------------|---------------|-----------------------------------------|
| O1—C8              | 1.241(3)                                | C5—H5         | 0.9300                                  |
| O2—C8              | 1.253(3)                                | C6—C7         | 1.506(4)                                |
| N1—C1              | 1.342(3)                                | C6—H6A        | 0.9700                                  |
| N1—C5              | 1.350(3)                                | C6—H6B        | 0.9700                                  |
| N1—C6              | 1.496(3)                                | C7—C8         | 1.548(4)                                |
| C1—C2              | 1.383(3)                                | C7—H7A        | 0.9700                                  |
| C1—H1              | 0.9300                                  | C7—H7B        | 0.9700                                  |
| C2—C3              | 1.388(3)                                | O1W—H1WA      | 0.844(10)                               |
| C2—H2              | 0.9300                                  | O1W—H1WB      | 0.862(10)                               |
| C3—C4              | 1.394(3)                                | O3W—H3WA      | 0.857(10)                               |
| C3—C3 <sup>i</sup> | 1.498(4)                                | O3W—H3WB      | 0.853(10)                               |
| C4—C5              | 1.371(3)                                | O2W—H2WA      | 0.833(10)                               |
| C4—H4              | 0.9300                                  | O2W—H2WB      | 0.836(10)                               |
| <b>Bond</b>        | <b>Angle / <math>^\circ</math></b>      | <b>Bond</b>   | <b>Length / <math>^\circ</math></b>     |
| C1—N1—C5           | 120.2(2)                                | C7—C6—H6A     | 109.1                                   |
| C1—N1—C6           | 119.7(2)                                | N1—C6—H6B     | 109.1                                   |
| C5—N1—C6           | 120.1(2)                                | C7—C6—H6B     | 109.1                                   |
| N1—C1—C2           | 121.0(2)                                | H6A—C6—H6B    | 107.8                                   |
| N1—C1—H1           | 119.5                                   | C6—C7—H7A     | 109.3                                   |
| C2—C1—H1           | 119.5                                   | C8—C7—H7A     | 109.3                                   |
| C1—C2—H2           | 119.9                                   | C6—C7—H7B     | 109.3                                   |
| C3—C2—H2           | 119.9                                   | C8—C7—H7B     | 109.3                                   |
| C5—C4—H4           | 119.6                                   | H7A—C7—H7B    | 108.0                                   |
| C3—C4—H4           | 119.6                                   | O1—C8—O2      | 124.9(2)                                |
| N1—C5—C4           | 120.6(2)                                | O1—C8—C7      | 118.1(2)                                |
| N1—C5—H5           | 119.7                                   | O2—C8—C7      | 117.0(2)                                |
| C4—C5—H5           | 119.7                                   | H1WA—O1W—H1WB | 103(2)                                  |
| N1—C6—C7           | 112.5(2)                                | H3WA—O3W—H3WB | 107(2)                                  |
| N1—C6—H6A          | 109.1                                   | H2WA—O2W—H2WB | 108(2)                                  |

Symmetry code: (i)  $-x+1/2, y, -z+1$ .

**Table S3** Crystal and structure data for **ZnLCl**.

|                                                                               | <b>ZnLCl</b> (as-synthesized)           |
|-------------------------------------------------------------------------------|-----------------------------------------|
| Chemical formula                                                              | $C_{16}H_{16}Cl_4N_2O_4Zn_2$            |
| $M_r$                                                                         | 572.88                                  |
| Crystal system                                                                | Monoclinic                              |
| Space group                                                                   | $P2_1/n$                                |
| Temperature (K)                                                               | 293                                     |
| $a, b, c$ (Å)                                                                 | 6.7262(19), 12.841(4), 12.304(4)        |
| $\beta$ (°)                                                                   | 94.395(5)                               |
| $V$ (Å <sup>3</sup> )                                                         | 1059.6(6)                               |
| $Z$                                                                           | 2                                       |
| Radiation type                                                                | Mo- $K_\alpha$                          |
| Crystal size (mm)                                                             | 0.35 × 0.28 × 0.21                      |
| Diffractometer                                                                | Rigaku Pilatus 200K                     |
| Absorption correction                                                         | Multi-scan Sphere (Rigaku CrystalClear) |
| $R_{int}$                                                                     | 0.029                                   |
| $T_{min}, T_{max}$                                                            | 0.854, 1.000                            |
| No. of measured, independent and<br>observed [ $I > 2\sigma(I)$ ] reflections | 10982, 2433, 1883                       |
| $R[F^2 > 2\sigma(F^2)], wR(F^2), S$                                           | 0.030, 0.071, 1.03                      |
| No. of reflections                                                            | 2433                                    |
| No. of parameters                                                             | 127                                     |
| $\Delta\rho_{max}, \Delta\rho_{min}$ (e/Å <sup>-3</sup> )                     | 0.34, -0.29                             |

**Table S4** Selected bond lengths [ $\text{\AA}$ ] and angles [ $^\circ$ ] for **ZnLCl**.

| Bond                     | Length / $\text{\AA}$ | Bond                | Length / $\text{\AA}$ |
|--------------------------|-----------------------|---------------------|-----------------------|
| Zn1—O2 <sup>i</sup>      | 1.9791(18)            | O2—Zn1 <sup>i</sup> | 1.9791(18)            |
| Zn1—O1                   | 1.9803(19)            | N1—C15              | 1.330(3)              |
| Zn1—Cl1                  | 2.2168(9)             | N1—C11              | 1.333(3)              |
| Zn1—Cl2                  | 2.2346(8)             | N1—C16              | 1.496(3)              |
| O2—C18                   | 1.250(3)              | O1—C18              | 1.255(3)              |
| Bond                     | Angle / $^\circ$      | Bond                | Length / $^\circ$     |
| O2 <sup>i</sup> —Zn1—O1  | 112.14(9)             | C15—N1—C16          | 119.6(2)              |
| O2 <sup>i</sup> —Zn1—Cl1 | 113.26(7)             | C11—N1—C16          | 120.1(2)              |
| O1—Zn1—Cl1               | 106.01(6)             | C18—O1—Zn1          | 130.90(18)            |
| O2 <sup>i</sup> —Zn1—Cl2 | 99.44(6)              | O2—C18—O1           | 125.3(2)              |
| O1—Zn1—Cl2               | 105.94(6)             | O2—C18—C17          | 116.3(2)              |
| Cl1—Zn1—Cl2              | 119.94(4)             | O1—C18—C17          | 118.4(2)              |
| C18—O2—Zn1 <sup>i</sup>  | 125.66(17)            | N1—C15—C14          | 121.2(2)              |
| C15—N1—C11               | 120.3(2)              | N1—C16—C17          | 110.6(2)              |

Symmetry codes: (i)  $-x, -y+1, -z+1$ .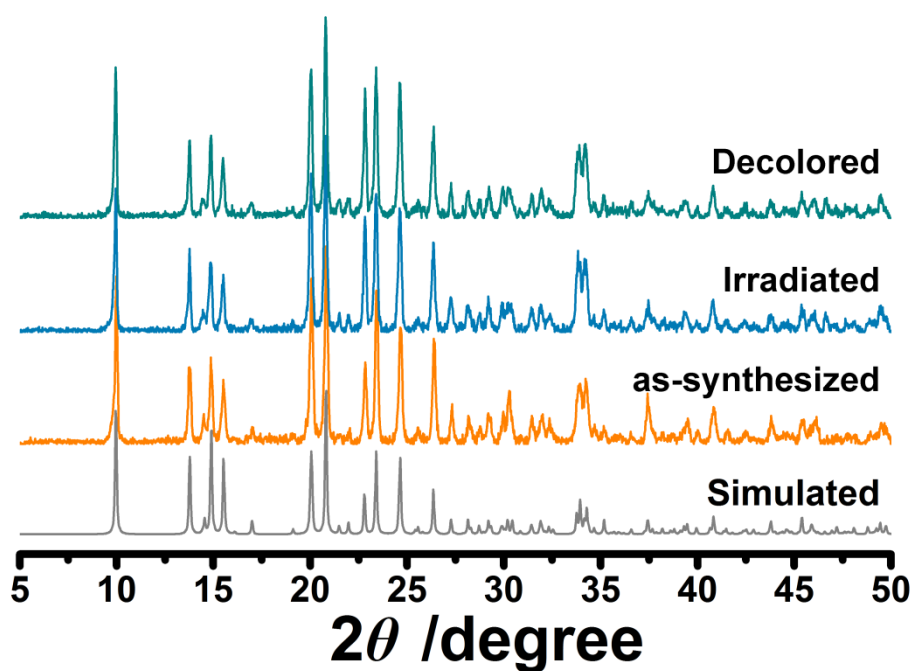**Fig. S1** PXRD patterns of **ZnLCl** in the photochromic process. For comparison, the simulated result from the single-crystal diffraction data is also shown.

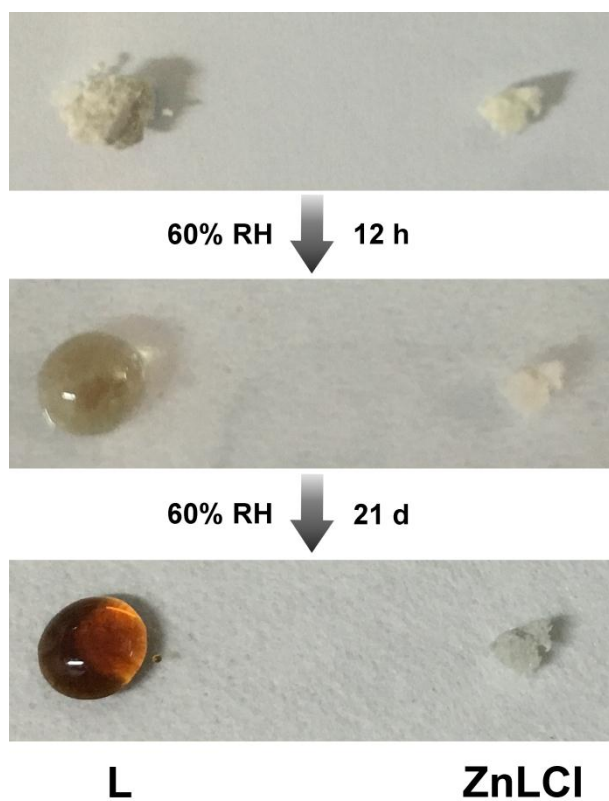

**Fig. S2** Time-dependent humidity test of free ligand **L** and **ZnLCl**. RH: relative humidity.

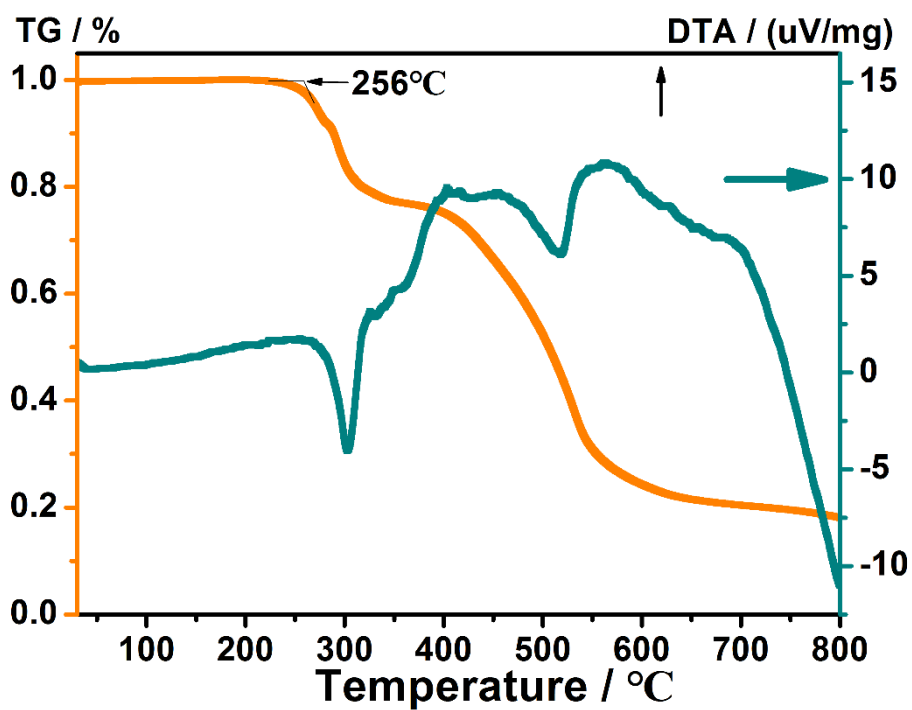

**Fig. S3** Thermogravimetric analysis (TGA) of **ZnLCl** in the  $N_2$  atmosphere.

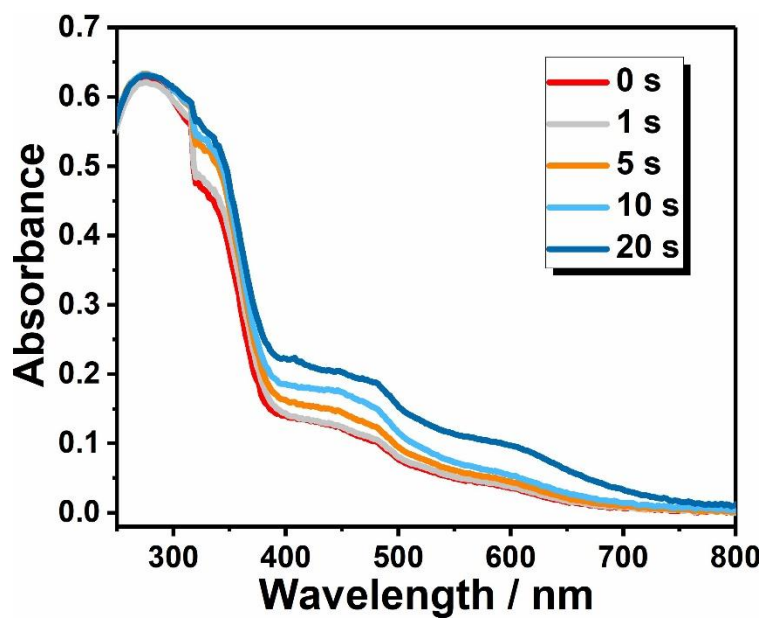

**Fig. S4** Time-dependent UV-vis spectra of **L**.

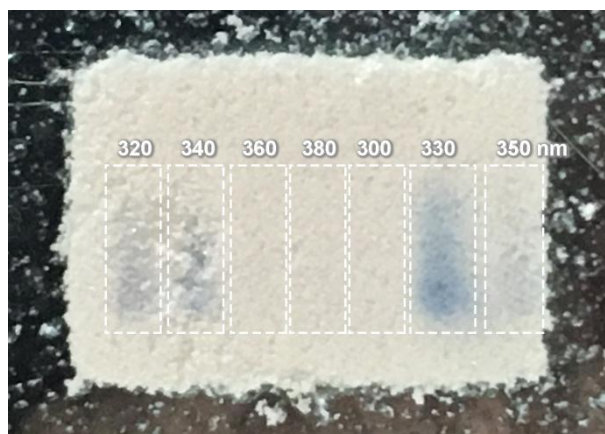

**Fig. S5** Photoresponse range of **ZnLCl** upon irradiation of UV light at characteristic wavelength (nm). Every spot was irradiated for 1 min.

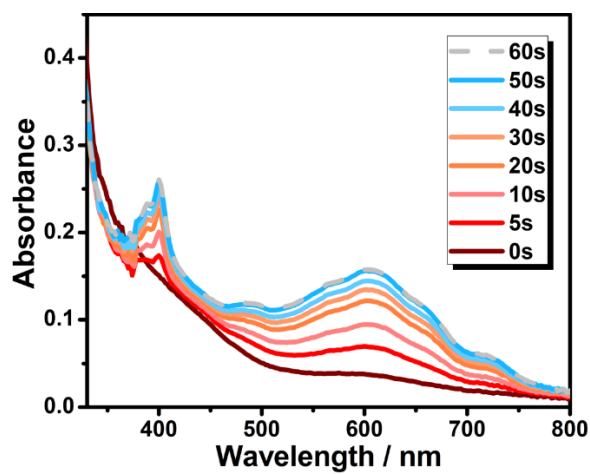

**Fig. S6** Time-dependent UV-vis spectra of **ZnLCl**.

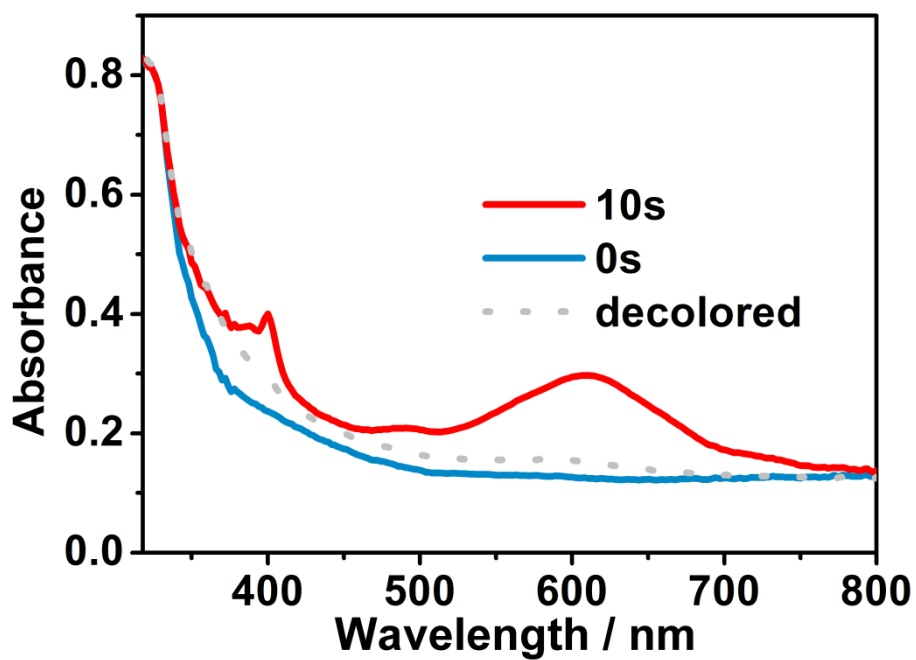

**Fig. S7** UV-vis absorbance spectra of **ZnLCl** in one photochromic process. The decolorated sample was obtained by leaving the irradiated sample in dark in air at ambient temperature for 12 h.

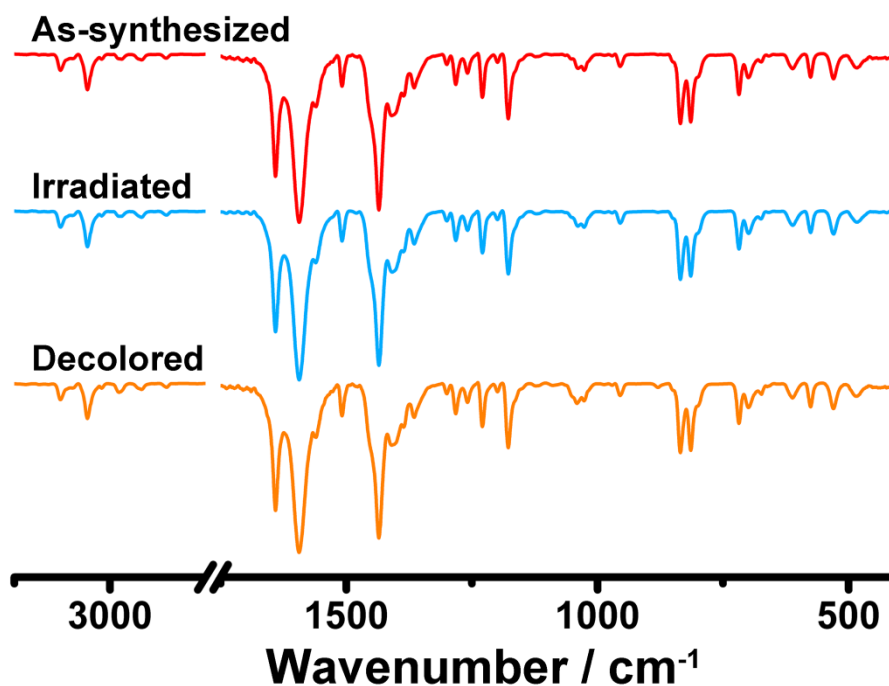

**Fig. S8** IR spectra of **ZnLCl** in one photochromic process.



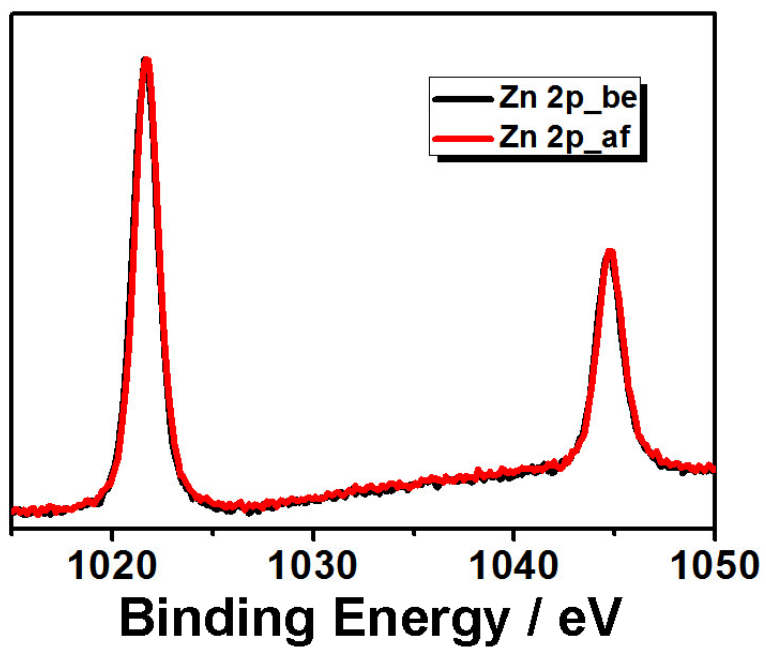

**Fig. S9** Normalized XPS core-level spectra of **ZnLCl** before and after irradiation under Xe lamp for 30 min. **be**: before irradiation; **af**: after irradiation.
